# Supplementary material
Source: PubMed Central journal article supplement (PMC2907239)
Supplement: NIHMS209988-supplement-ESI.pdf [file NIHMS209988-supplement-ESI.pdf]

**Title: A novel profluorescent probe for detecting oxidative stress induced by metal and H<sub>2</sub>O<sub>2</sub> in living cells**

**Authors:** Yibin Wei, Yi Zhang, Zhiwei Liu and Maolin Guo

*Department of Chemistry and Biochemistry, University of Massachusetts,  
Dartmouth, MA 02747 (USA)*

**Supporting information**

- 1. Materials and instruments**
- 2. Synthesis and characterization**
- 3. Cell culture**
- 4. Figs. S1-S11.**

## 1. Materials and instruments

2-formylphenylboronic acid, pinacol ester was purchased from Combi-Blocks, Inc. Rhodamine B and salicylaldehyde were purchased from Sigma-Aldrich. Other chemicals and solvents are of analytical pure grade. Solutions of  $\text{Fe}^{2+}$  and  $\text{Fe}^{3+}$  were prepared freshly by dissolving their chloride salts into 0.01 M HCl, while ferrous ammonium sulfate,  $\text{CuCl}_2$  and solutions of other metal ions were prepared freshly in double-distilled water.

$^1\text{H}$  and  $^{13}\text{C}$  NMR spectra were recorded on a Bruker DRX-300 spectrometer. ESI-MS analyses were performed using a Perkin-Elmer API 150EX mass spectrometer. UV/Vis spectra were recorded on a Perkin-Elmer Lambda 25 spectrometer at 298 K. Fluorescence spectra were recorded on a Perkin-Elmer LS55 luminescence spectrometer at 293 K. The excitation wavelengths and filters used were indicated in the figures. The pH measurements were carried out on a Corning pH meter equipped with a Sigma-Adrich micro combination electrode calibrated with standard buffer solution. The fluorescence responses of the probe in living cells were investigated under a Zeiss LSM 710 laser scanning confocal microscope. Excitation wavelength of laser was 510 nm and emission spectra were integrated over the range 520-580 nm. The REUSE function controlled by Zeiss software was applied to guarantee that all spectra were recorded under the same instrumental conditions.

## 2. Synthesis and characterization

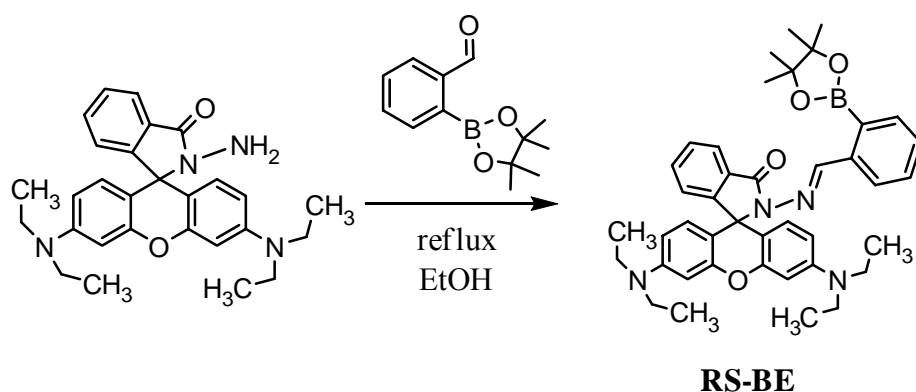

Rhodamine B hydrozide and the active chelator **Rh-SBH** were synthesized according to the reported procedure and characterized by NMR and Mass spectra. <sup>4</sup>

Synthesis of **RS-BE**. 2-formylphenylboronic acid pinacol ester (1 mmol, 0.150 g) was added into 15 mL ethanolic solution of Rhodamine B hydrozide (1 mmol, 0.46 g), and then the solution was heated to flux under a nitrogen atmosphere for 3 h. The solution was concentrated through removing solvent by rotorevaporation, and then cooled down to room temperature. The obtained precipitate was further washed with ice-cold ethanol three times to afford the pure product (**RS-BE**) as pink solid (0.20 g, 30%).  $^1\text{H}$  NMR spectrum is shown in Fig. S5.  $\delta_{\text{H}}$  (300 MHz;  $(\text{CD}_3)_2\text{SO}$ ;  $\text{Me}_4\text{Si}$ ,  $\delta$ , ppm) 9.4(1 H, s), 7.89(1 H, d,  $J$  6.9), 7.81(1 H, d,  $J$  7.8), 7.51-7.63(3 H, m), 7.45(1 H, t,  $J$  6.5, 6.6), 7.32(1 H, m), 7.09(1 H, d,  $J$  7.2), 6.39-6.46(4 H, m), 6.30-6.36(2 H, m), 3.31(8 H, q,  $J$  7.8, 7.3), 1.23(12 H, s), 1.06(12 H, t,  $J$  6.9);  $\delta_{\text{C}}$ ( $\text{CDCl}_3$ ,  $\text{Me}_4\text{Si}$ ) 165, 153, 148, 141, 135, 133, 130, 128, 127, 125.3, 123.4, 107.7, 107.1, 98.4, 83.7, 66.2, 44.3, 24.6, 12.6. ESI-MS:  $m/z$ , 671.3  $[\text{M}+\text{H}]^+$ , 693.7  $[\text{M}+\text{Na}]^+$ ,  $\text{C}_{41}\text{H}_{47}\text{BN}_4\text{O}_4$  requires 670.37. The purity of the compound was also confirmed by HPLC.

### 3. Cell culture

Human SH-SY5Y neuroblastoma cells were obtained from ATCC (American Type Culture Collection). Cells were maintained in 1:1 mixture of Eagles Minimal Essential medium (ATCC) and Ham's F12 medium (ATCC) supplemented with 10% fetal bovine serum (ATCC) without any antibiotics and incubated at 37°C in a humidified atmosphere with 5%  $\text{CO}_2$ . The cells were routinely subcultured using 0.05% trypsin-EDTA solution (ATCC). The cells were seeded on 2-chamber slides for 48 hours at  $5 \times 10^4$  cells/chamber and grown until each chamber was 20-30% confluent.

The sensor **RS-BE** was dissolved in acetonitrile at a concentration of 1 mM, and then was pre-diluted to a concentration of 10  $\mu\text{M}$  in culture medium without fetal bovine serum. Cell culture medium was removed from the cells in the chamber and replaced with the fresh medium containing the sensor (10  $\mu\text{M}$ ).

## Figures S1-S11

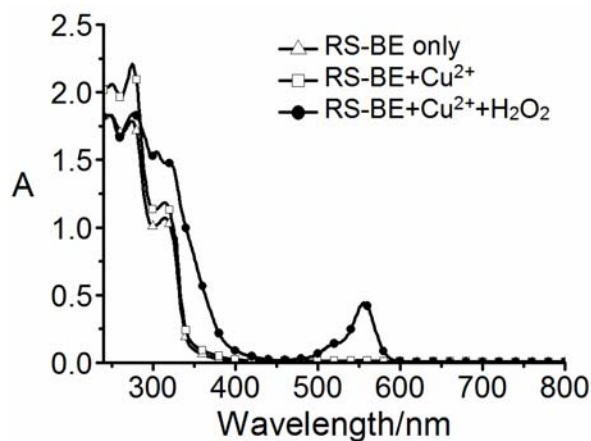

**Fig S1.** Absorption spectra of 50  $\mu\text{M}$  **RS-BE**, with 50  $\mu\text{M}$   $\text{Cu}^{2+}$  before and after addition of 500  $\mu\text{M}$   $\text{H}_2\text{O}_2$  (60 min) in acetonitrile/KPB buffer (10 mM, pH 7.5, v/v 1:1).

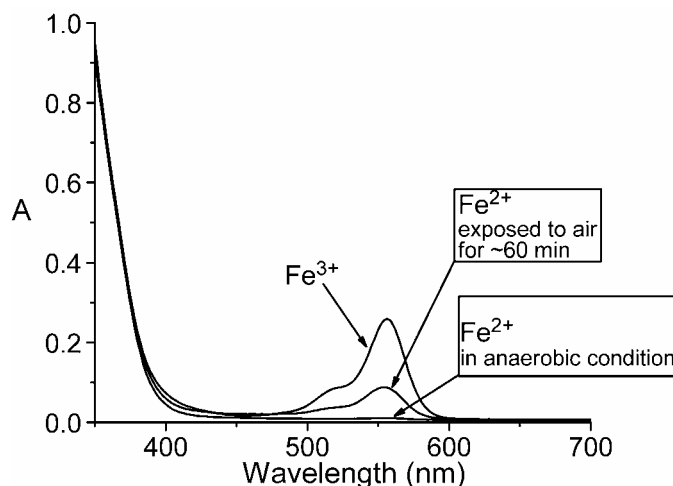

**Fig. S2** Absorption spectra of 50  $\mu\text{M}$  **Rh-SBH** incubated with 50  $\mu\text{M}$   $\text{Fe}^{3+}$  (top line) or  $\text{Fe}^{2+}$  (bottom line) under anaerobic conditions in acetonitrile/KPB buffer (10 mM, pH 7.5, v/v 1:1). The middle line is the spectrum of that with  $\text{Fe}^{2+}$  after exposed to air for  $\sim 60$  min. As shown in this figure, Rh-SBH displayed full response to  $\text{Fe}^{3+}$  but little response to  $\text{Fe}^{2+}$  under anaerobic conditions in ACN/KPB buffer. However, after the solution with  $\text{Fe}^{2+}$  was exposed to air for  $\sim 60$  min, the absorption peak at 554 nm appeared but with lower intensity compared to that with  $\text{Fe}^{3+}$ . This can be ascribed to the slow air-oxidation of  $\text{Fe}^{2+}$  to  $\text{Fe}^{3+}$ , that subsequently triggered the absorption response of Rh-SBH. These data suggest that Rh-SBH response to  $\text{Fe}^{3+}$ , not  $\text{Fe}^{2+}$ .

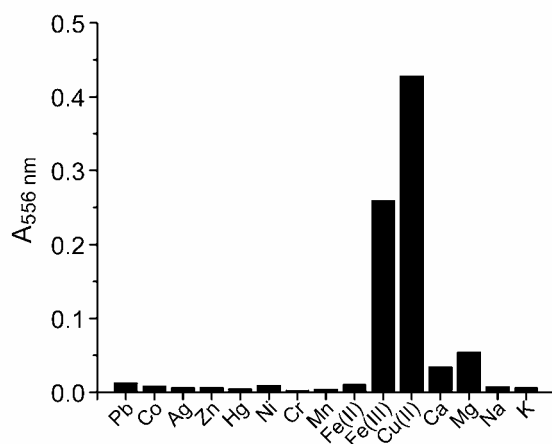

**Fig. S3.** Absorption responses (556 nm) of 50 μM of Rh-SBH to various metal ions including 50 μM of Pb<sup>2+</sup>, Co<sup>2+</sup>, Ag<sup>+</sup>, Zn<sup>2+</sup>, Hg<sup>2+</sup>, Ni<sup>2+</sup>, Cr<sup>3+</sup>, Mn<sup>2+</sup>, Fe<sup>2+</sup>, Fe<sup>3+</sup>, Cu<sup>2+</sup>, as well as 1 mM of Ca<sup>2+</sup>, Mg<sup>2+</sup>, Na<sup>+</sup> and K<sup>+</sup> in ACN/KPB buffer (10 mM, pH 7.5, v/v 1:1).

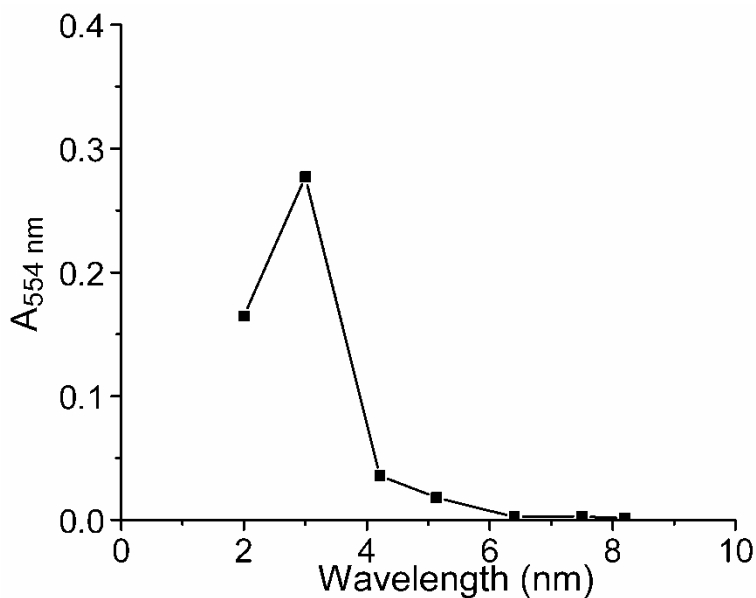

**Fig. S4.** Absorption profile of 50 μM of Rh-SBH under varied pH values of 2, 3, 4.21, 5.13, 6.4, 7.50 and 8.20. Little characteristic color of rhodamine could be observed for Rh-SBH between pH 5.0 and 8.2, suggesting that the spiro lactam form is stable in physiological relevant pH range.

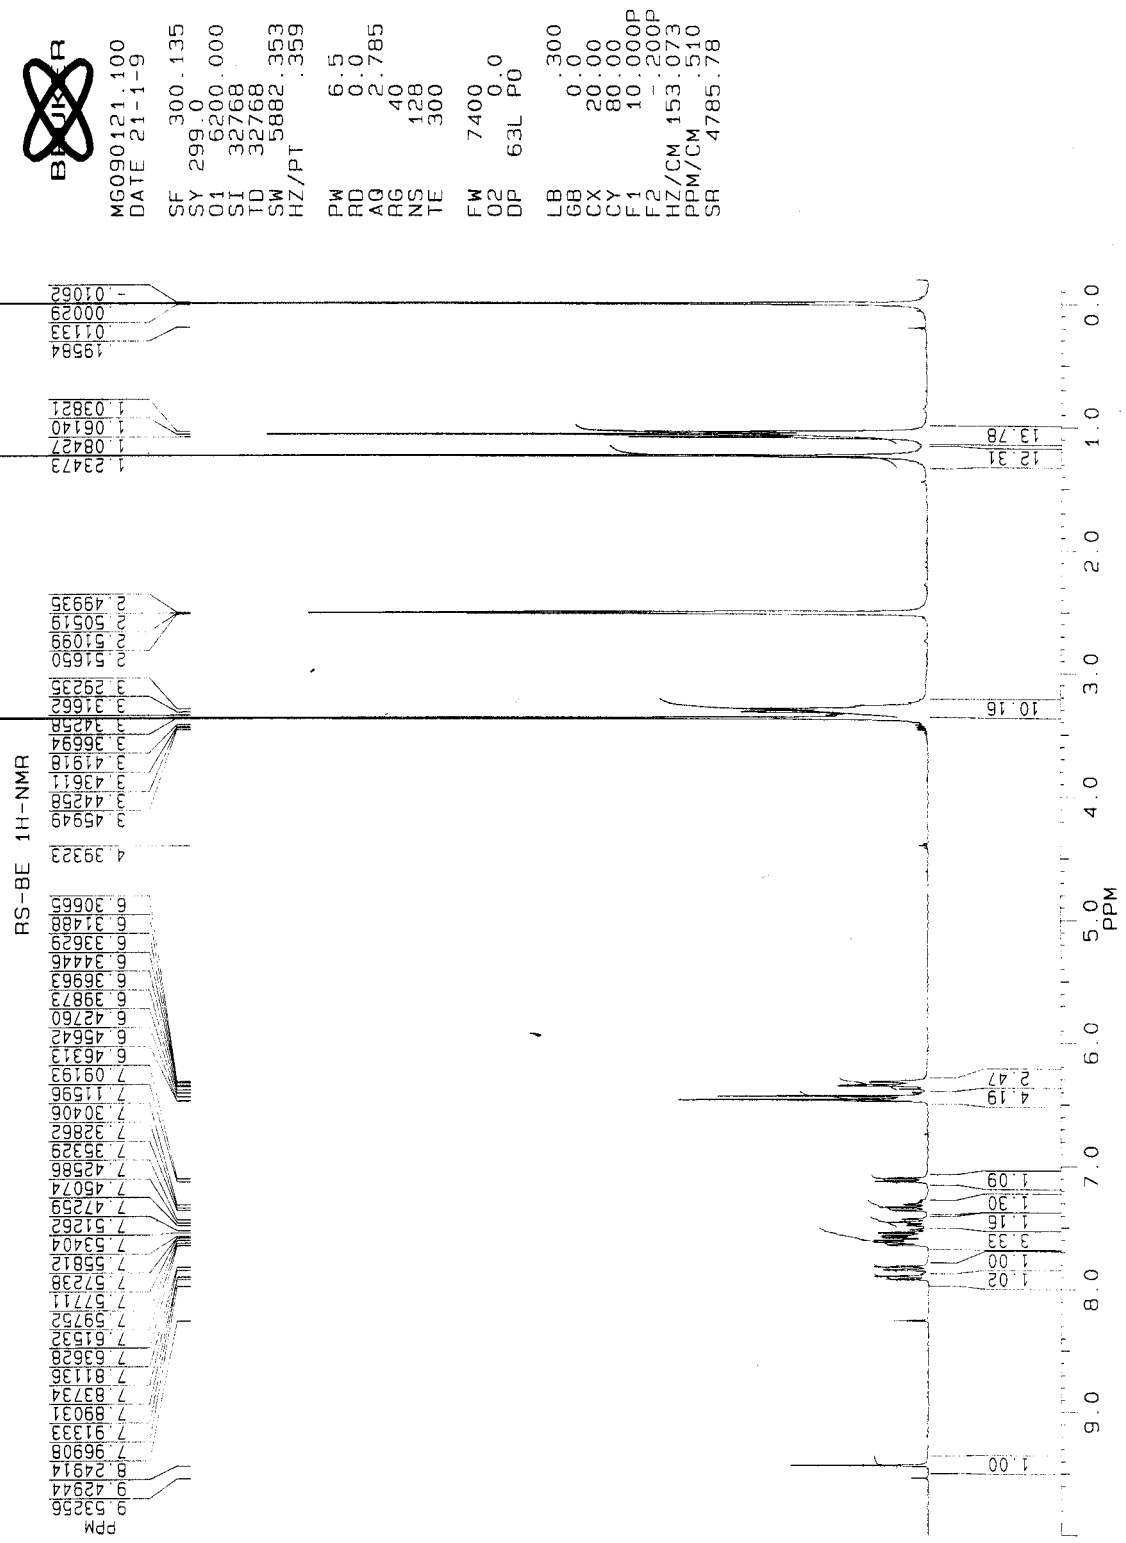

Fig. S5 <sup>1</sup>H NMR spectrum of 5 mM RS-BE in (CD<sub>3</sub>)<sub>2</sub>SO.

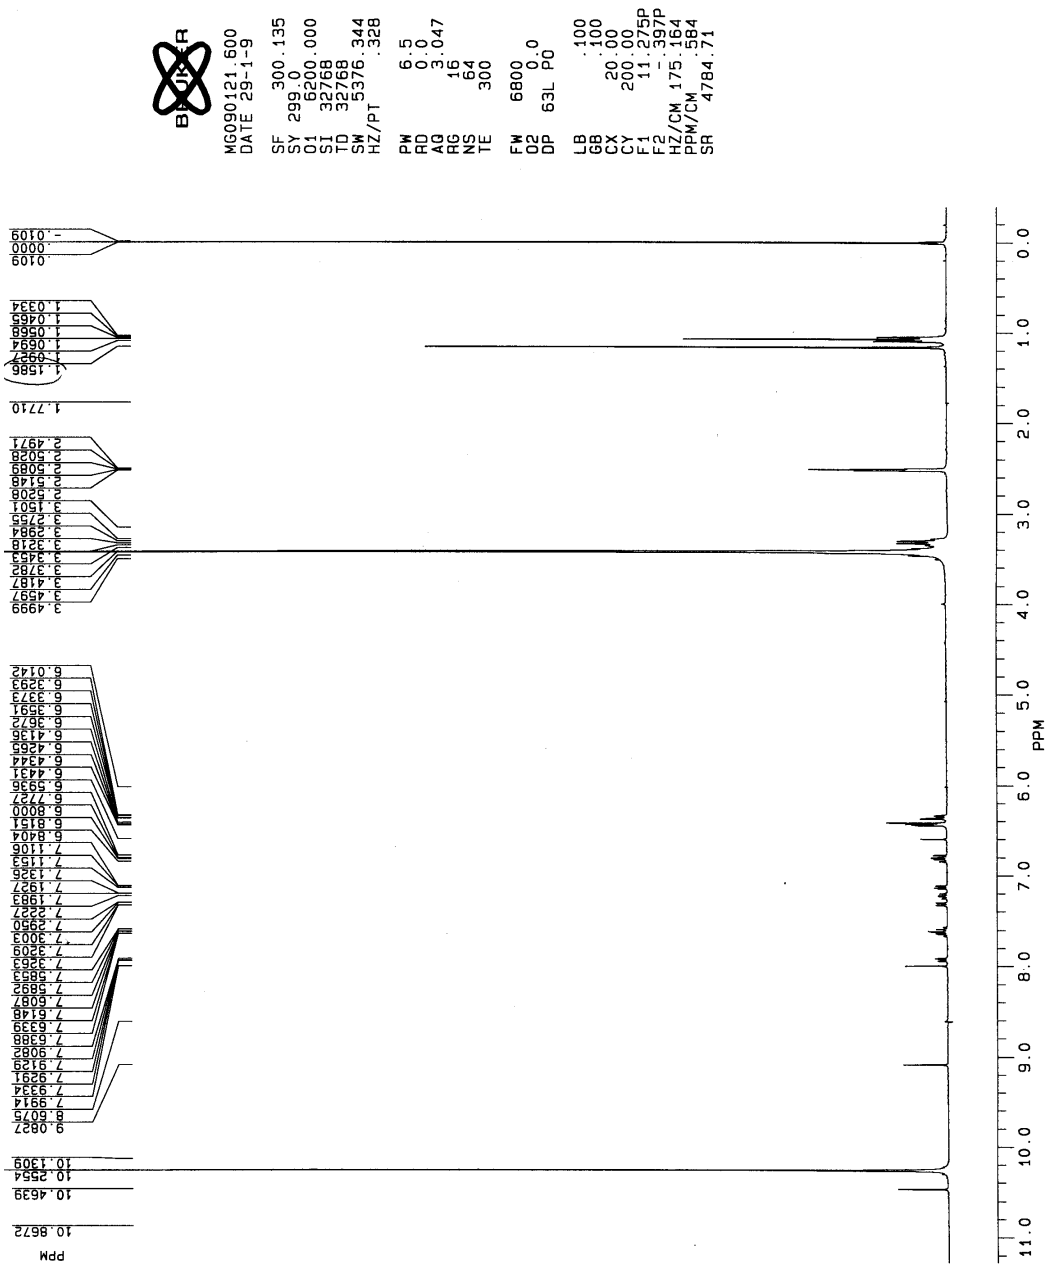

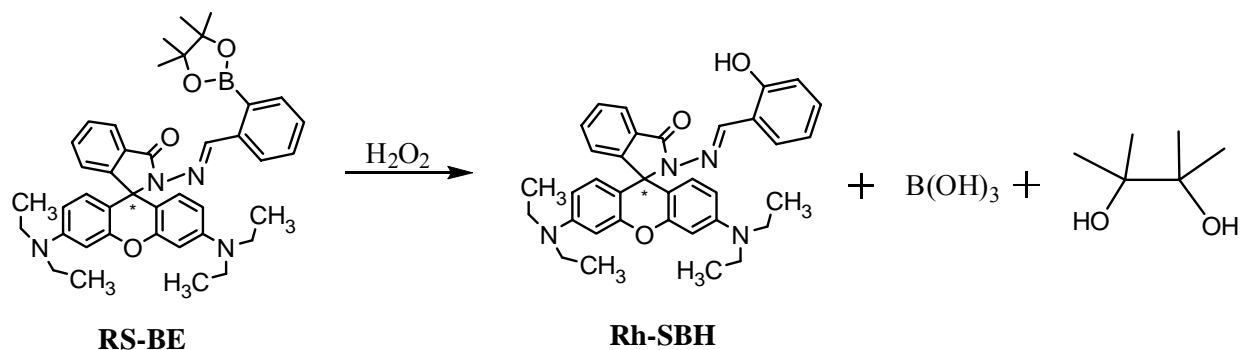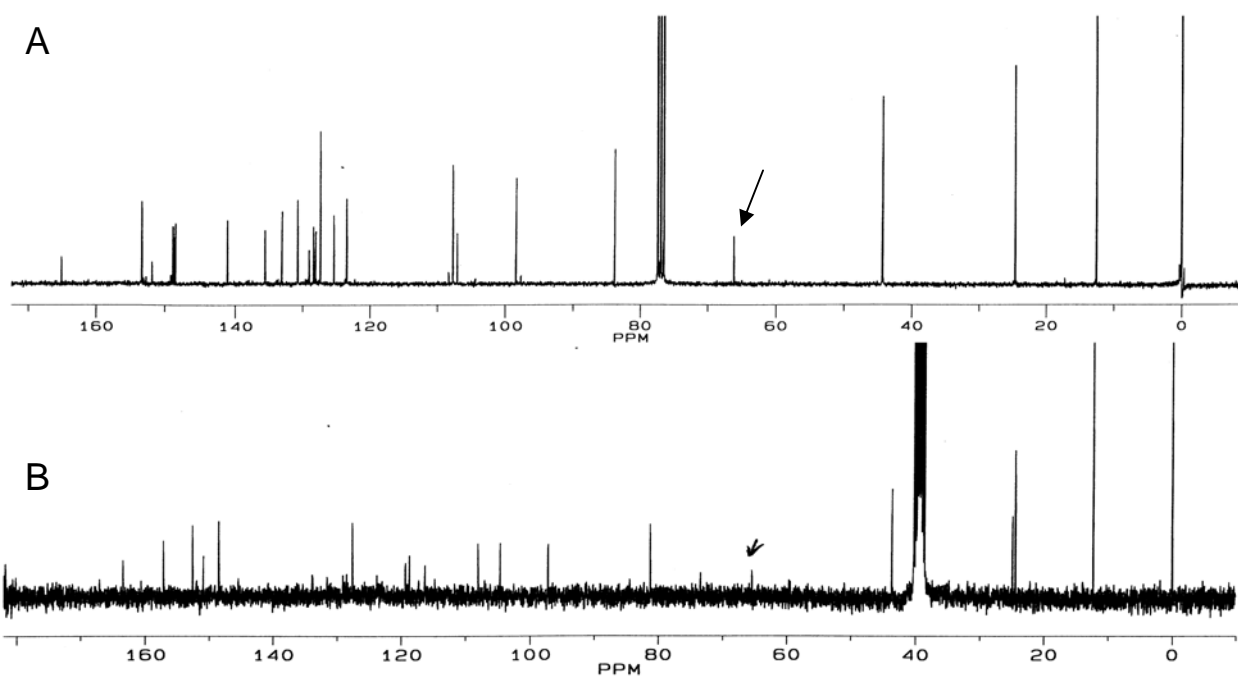

**Fig. S7**  $^{13}\text{C}$  NMR spectra of (A) 5 mM **RS-BE** only in  $\text{CDCl}_3$  and (B) 5 mM **RS-BE** with 50 mM  $\text{H}_2\text{O}_2$  incubated in  $(\text{CD}_3)_2\text{SO}$  for 24 h. The characteristic peak of the 9-carbon (marked with \*) at  $\sim \delta$  66.2 ppm was still discernible after the reaction with  $\text{H}_2\text{O}_2$ , suggesting that  $\text{H}_2\text{O}_2$  did not induce the conversion of RS-BE/Rh-SBH from the spiro lactam (ring-closed) form to the ring-opened amide form.



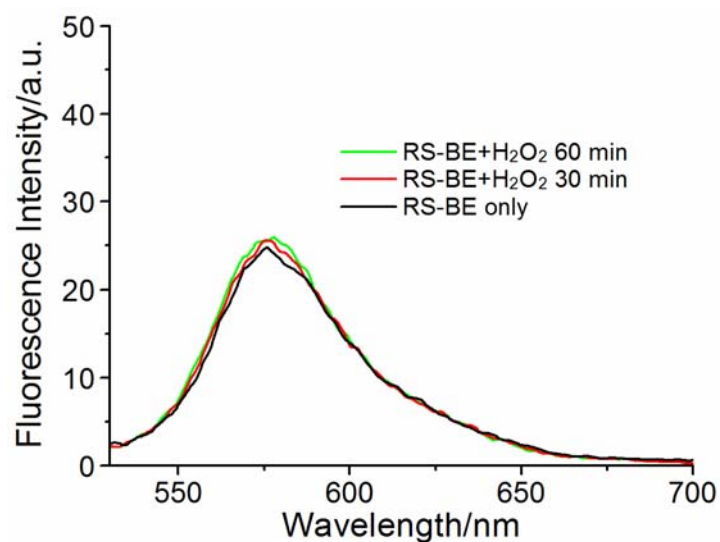

**Fig. S8** Fluorescent spectra ( $E_x$ , 510 nm;  $E_m$ , 580 nm) of 50  $\mu$ M RS-BE (black line) and after the addition of 500  $\mu$ M H<sub>2</sub>O<sub>2</sub> for 30 min (red line) and 60 min (green line) in acetonitrile/KPB buffer (10 mM, pH 7.5, v/v 1:1).

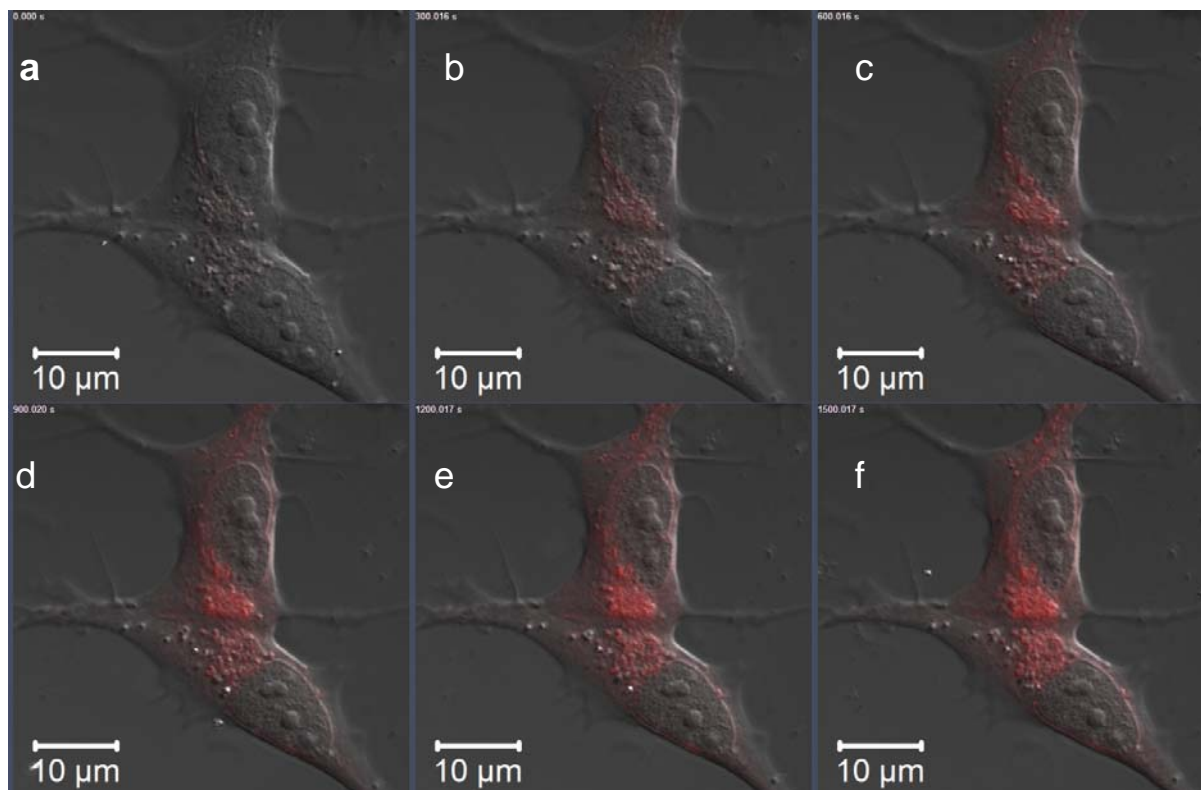

**Fig. S9** Time course of the confocal fluorescence images of live human SH-SY5Y neuroblastoma cells pretreated with RS-BE and Fe(8-HQ) (10  $\mu$ M each) after the addition of 100  $\mu$ M H<sub>2</sub>O<sub>2</sub> for 0, 5, 10, 15, 20, 25 min (a-f).

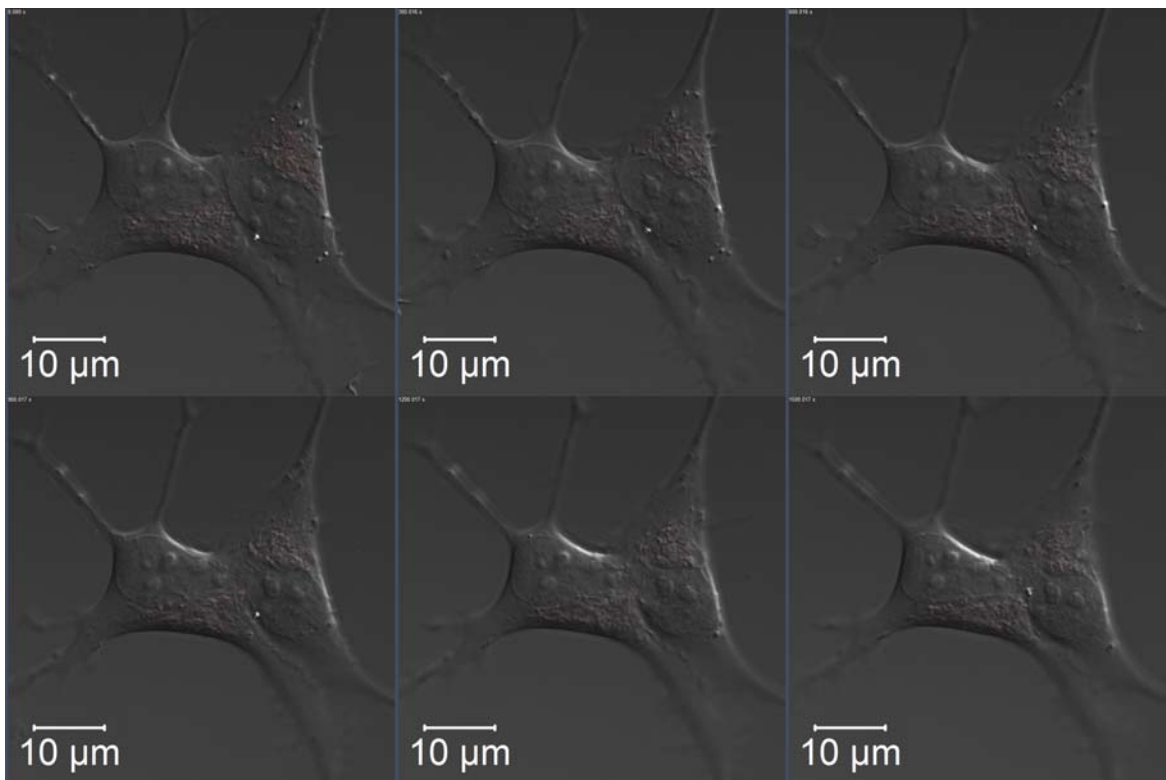

**Fig. S10** Time course of the confocal fluorescence images of live human SH-SY5Y neuroblastoma cells pretreated with RS-BE and  $\text{CuCl}_2$  ( $10 \mu\text{M}$  each) after the addition of  $100 \mu\text{M}$   $\text{H}_2\text{O}_2$  for 0, 5, 10, 15, 20, 25 min (a-f). Little intracellular fluorescence enhancement was observed after the addition of  $\text{H}_2\text{O}_2$  to the cells.

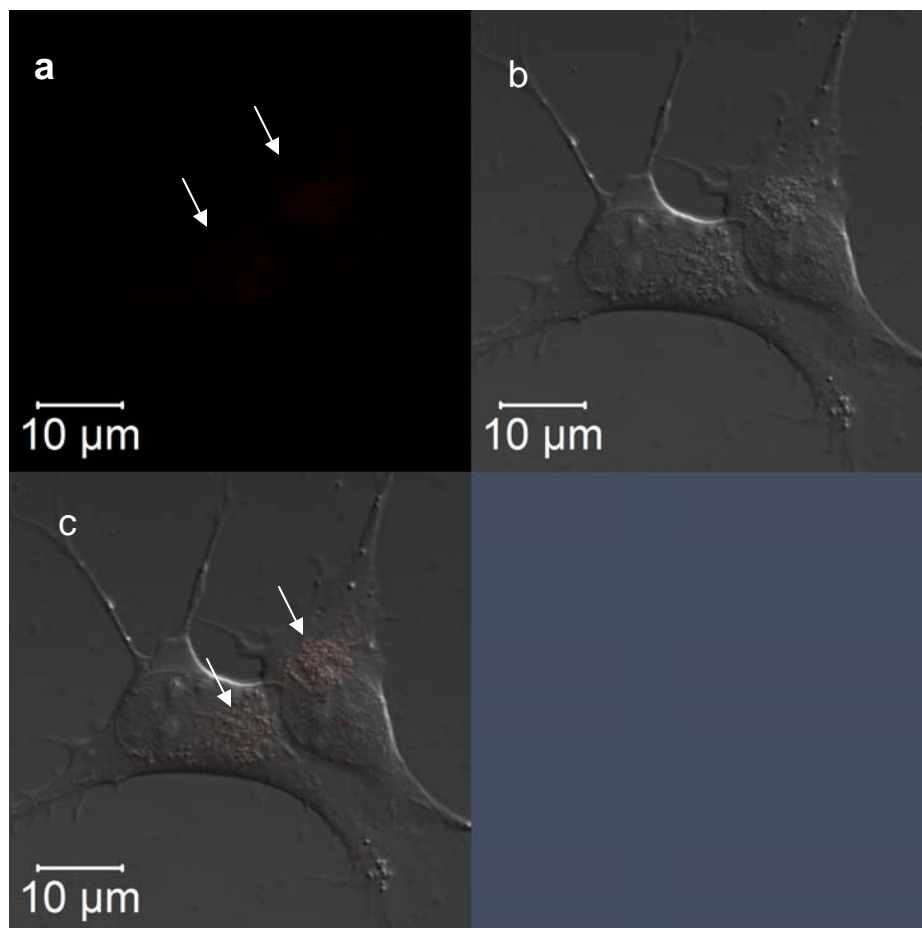

**Fig. S11** Confocal fluorescence images of live human SH-SY5Y neuroblastoma cells pretreated with RS-BE (10  $\mu$ M) and  $\text{CuCl}_2$  (50  $\mu$ M) after the addition of 500  $\mu$ M  $\text{H}_2\text{O}_2$  for 30 min. (a) confocal image, (b) DIC, (c) overlay of (a) and (b). Weak intracellular fluorescence enhancement (indicated by arrows) was observed after the addition of  $\text{H}_2\text{O}_2$  to the cells.
